# Supplementary material for: Innovative Approach in the Cryogenic Freezing Medium for Mesenchymal Stem Cells
Source: MDPI journal article supplement (doi:10.3390/biom12050610), 2022-04-20
Supplement: s1 [file s1]

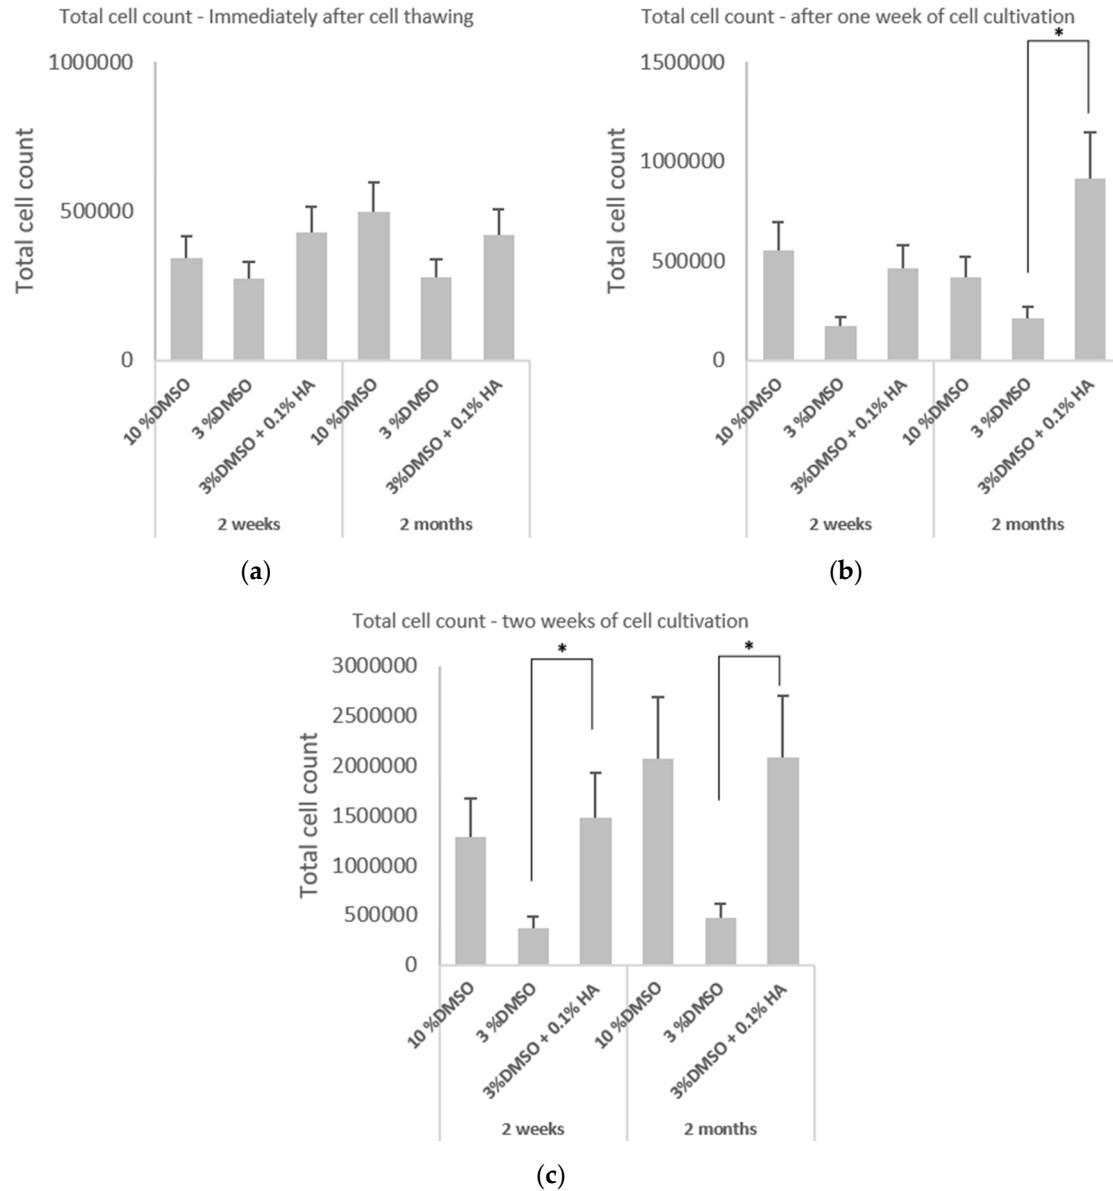

**Figure S1.** Comparison of 2 weeks/2months cryostorage. Total ADSCs count measured using CaSy cell counter (OMNI Life Science GmbH): **(a)** immediately after thawing; **(b)** after one week of cell cultivation; **(c)** after two weeks of cell cultivation. Data are presented as a mean and SD plotted as error bars. The statistical significances ( $* p < 0.05$ ) were performed between control and experimental groups using Friedman's test followed by Dunn's multiple comparison test.

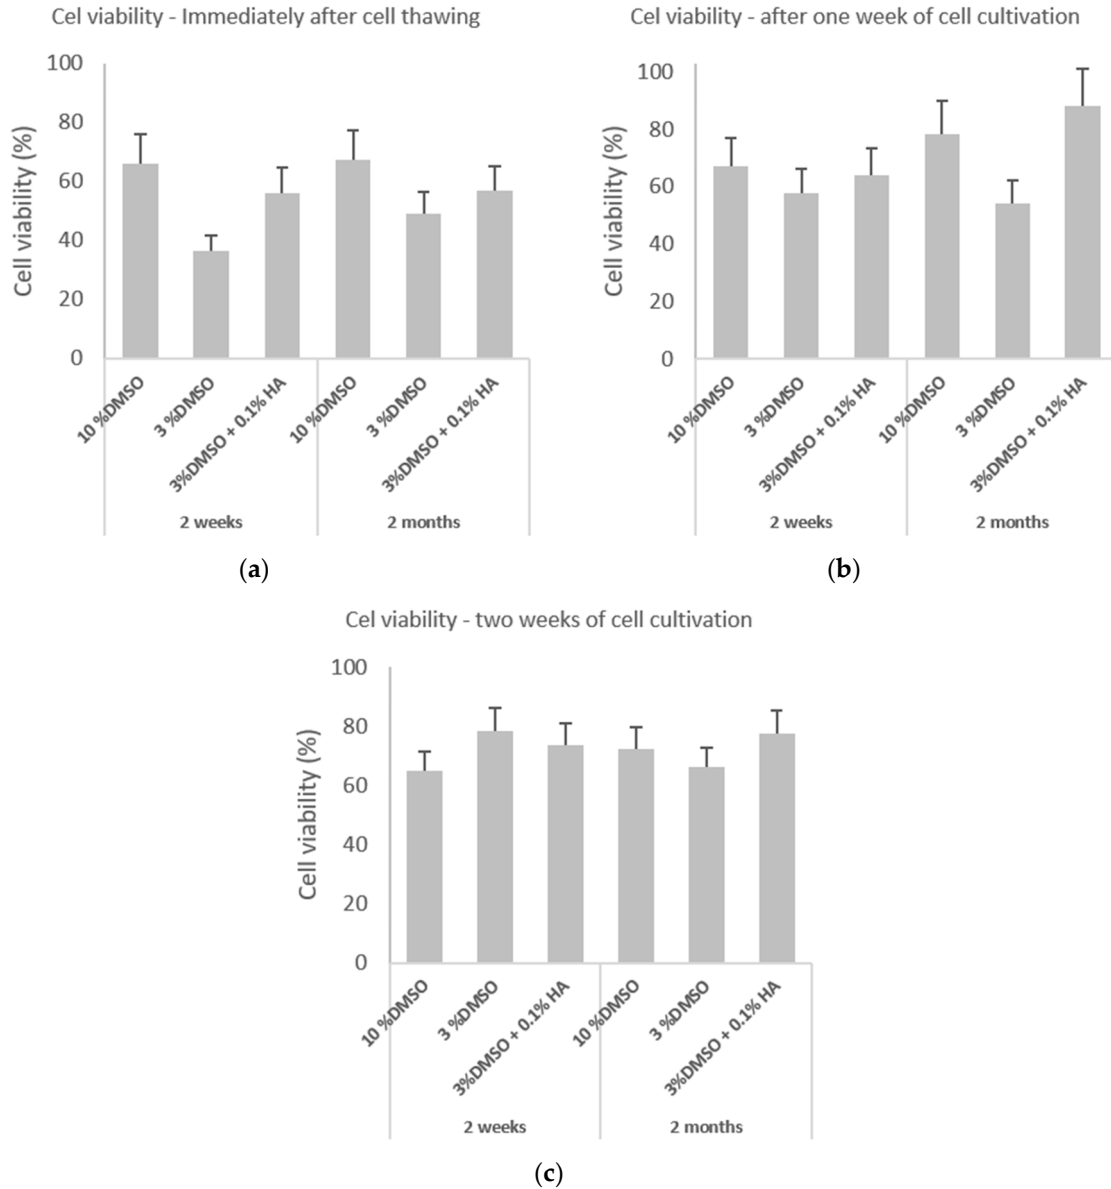

**Figure S2.** Comparison of 2 weeks/2months cryostorage. Viability of ADSCs measured using pulse area analysis and electronic current exclusion/pulse-field analysis on CaSy cell counter (OMNI Life Science GmbH): **(a)** immediately after thawing; **(b)** after one week of cell cultivation; **(c)** after two weeks of cell cultivation. Data are presented as a mean and SD plotted as error bars. The statistical analysis was performed between control and experimental groups using Friedman's test followed by Dunn's multiple comparison test.

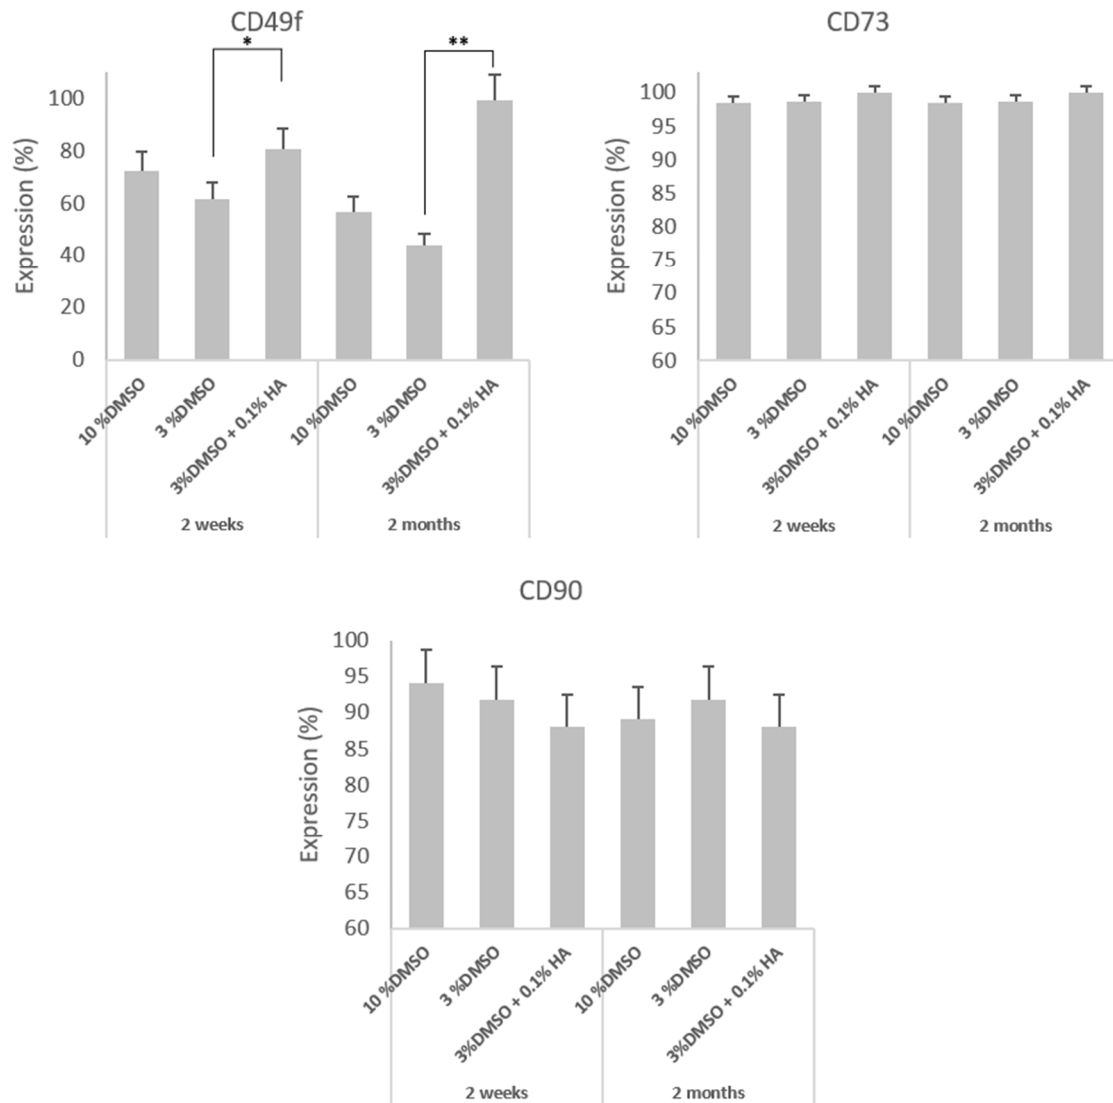

**Figure S3.** Comparison of 2 weeks/2months cryostorage. Phenotype profiles of ADSCs, evaluated after and prior to and 2 weeks post-cryopreservation. The layouts of graphs illustrate percentages of positive cells, determined as the percentage with a fluorescence intensity greater than 99.5% of the negative isotype immunoglobulin control. Data are presented as a mean and SD plotted as error bars. The statistical significances (\*  $p < 0.05$ ; \*\*  $p < 0.01$ ) were calculated using one-way ANOVA, followed by Dunnett's multiple comparison test for continuous variables.
